# Supplementary figures and images for: Long‐term follow up of nivolumab in previously untreated Japanese patients with advanced or recurrent malignant melanoma
Source: PubMed Central journal article supplement — Cancer Sci. 2019 May 23;110(6):1995–2003. doi: 10.1111/cas.14015 (PMC6549931; doi:10.1111/cas.14015), 2019-05-23

**Fig. S1.** Kaplan–Meier curves for overall survival by *BRAF* variant

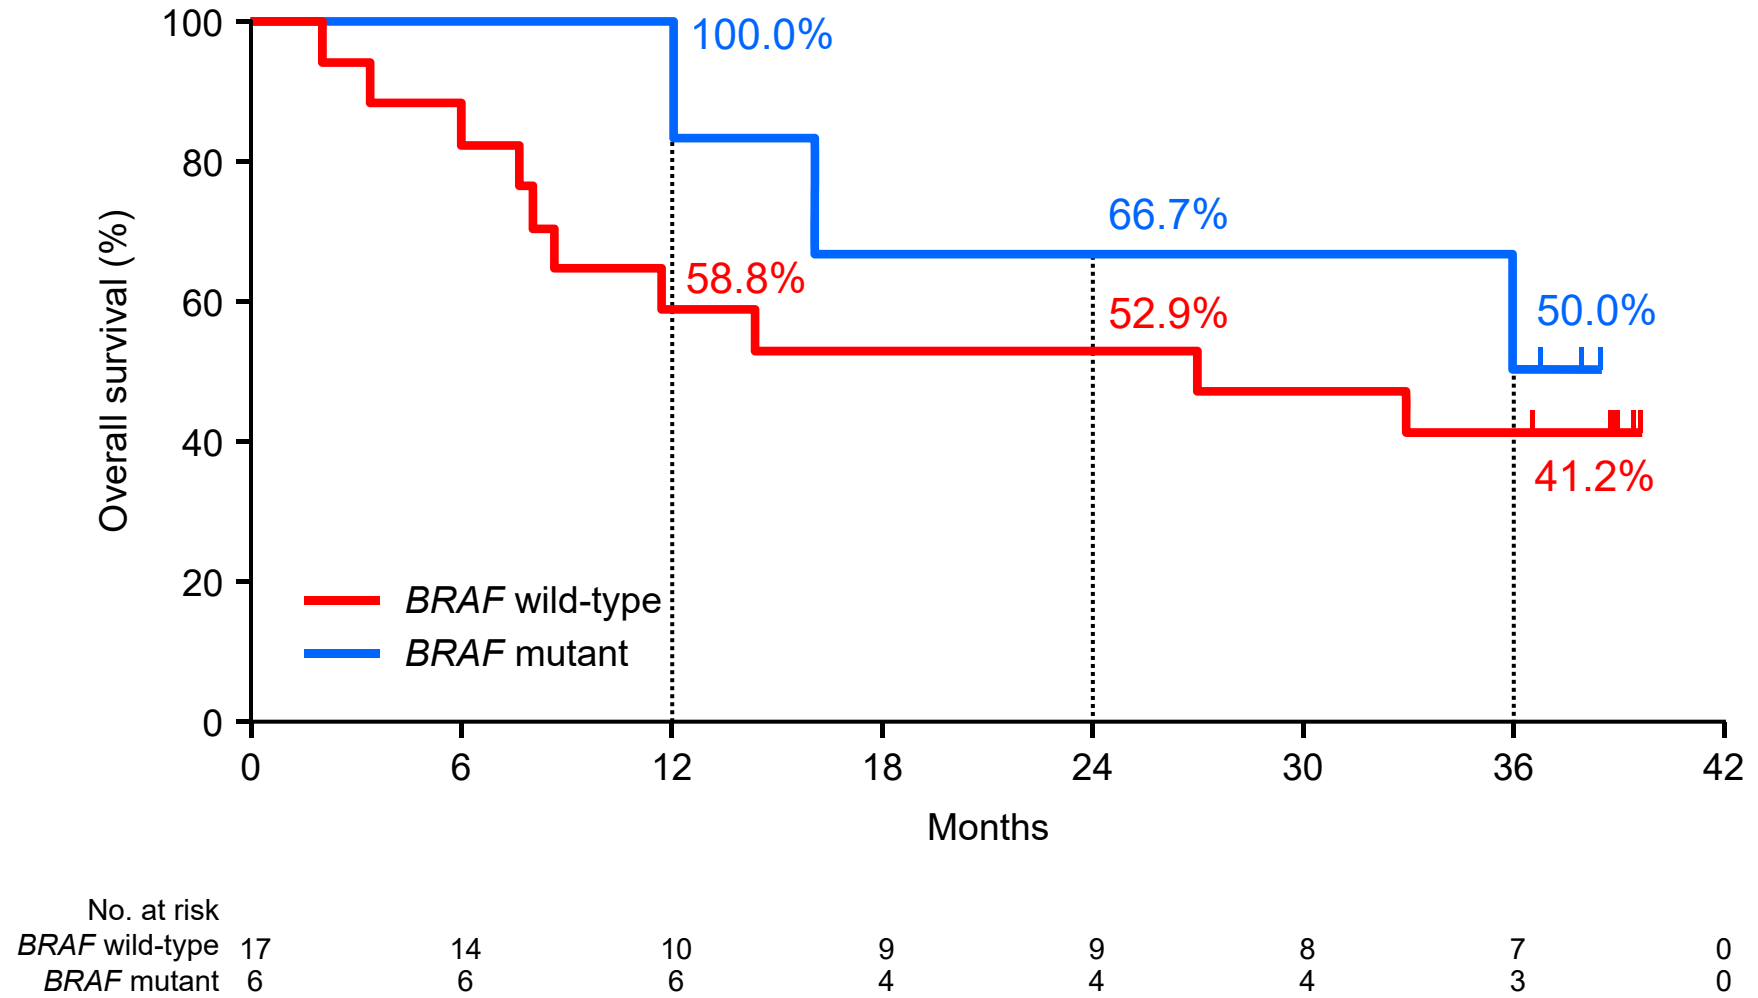

Supplement: CAS-110-1995-s001.pdf [file CAS-110-1995-s001.pdf]

**Fig. S2.** Kaplan–Meier curves for progression-free survival by *BRAF* variant

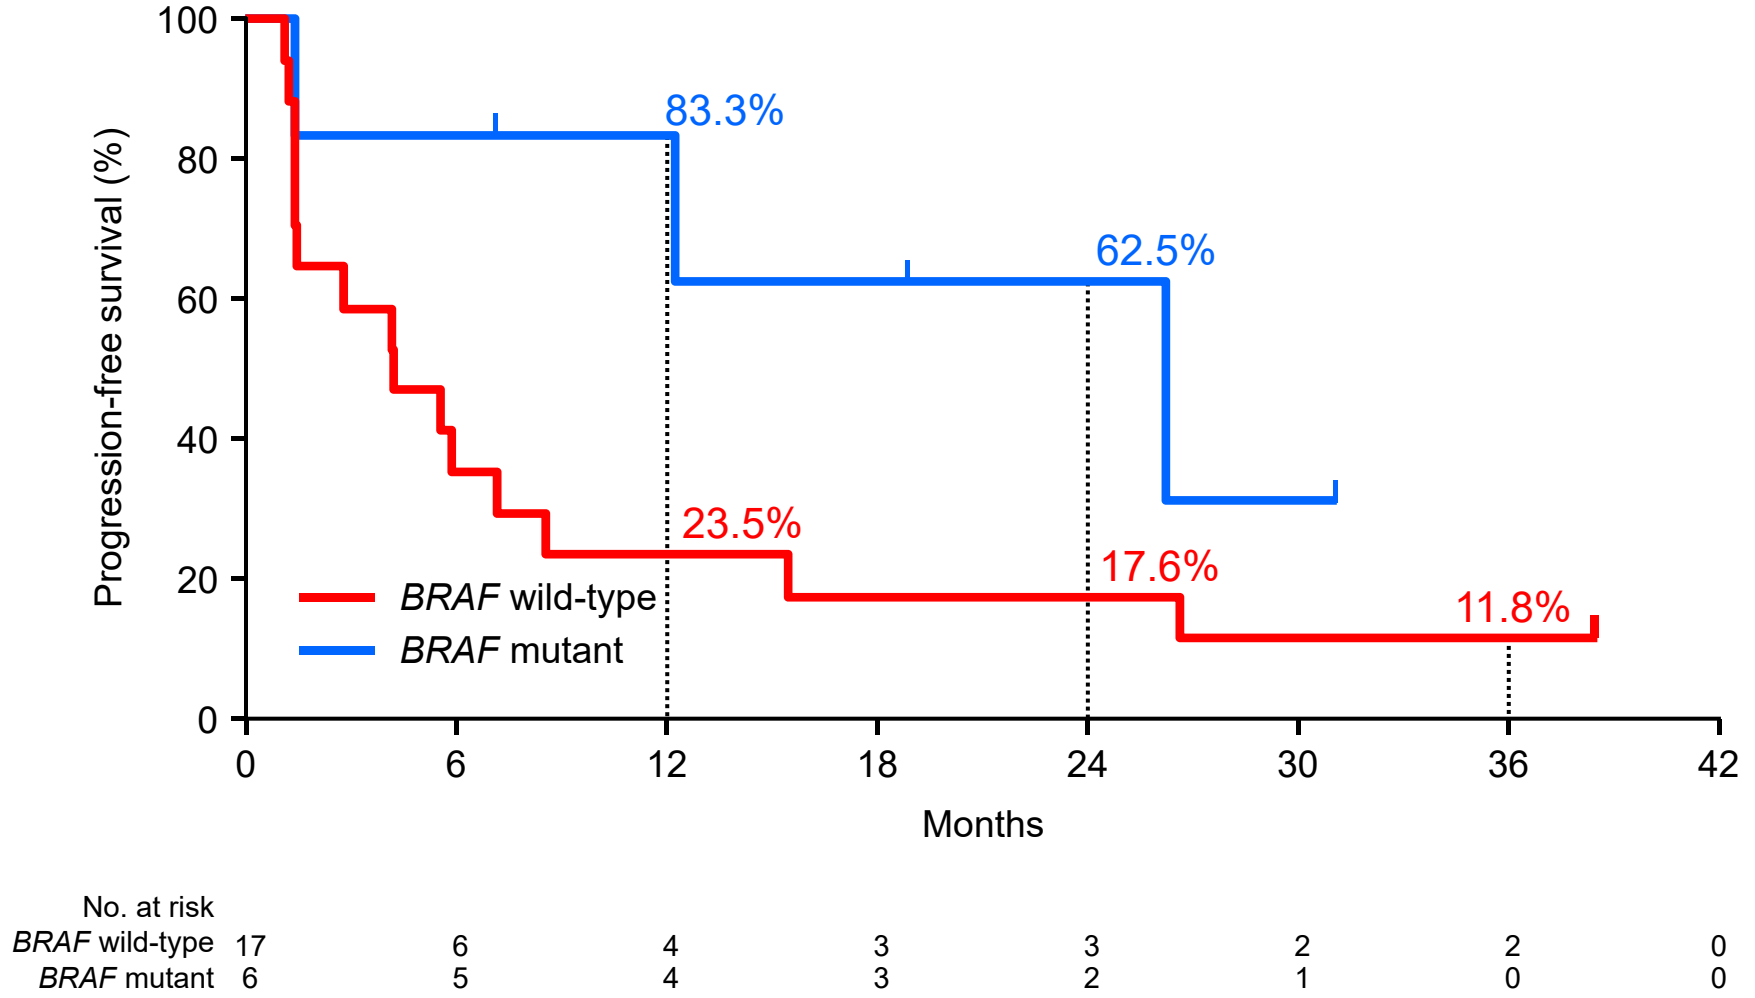

Supplement: CAS-110-1995-s002.pdf [file CAS-110-1995-s002.pdf]
